# Supplementary material
Source: PubMed Central journal article supplement (PMC3145724)
Supplement: 1105695108_pnas.201105695SI.pdf [file 1105695108_pnas.201105695SI.pdf]

# Supporting Information

Khodoun et al. 10.1073/pnas.1105695108

## SI Materials and Methods

**Reagents.** Hybridomas were obtained from the following sources: rat IgG2b anti-mouse Fc $\gamma$ RII/RIII mAb (2.4G2) (1), mouse IgE anti-TNP (IGEL 2a), and mouse IgG1 anti-TNP (1B7.11, used as an isotype control) from the ATCC; mouse anti-mouse Fc $\gamma$ RIIb (Ly17.2) (2) from Ulrich Hammerling; rat IgG2b anti-NP (J1.2, used as an isotype control) from John Abrams; and rat IgG2a anti-mouse IgE mAb (EM-95) (3) from Zelig Eshhar. Hybridomas were grown as ascites in Pristane-primed athymic nude mice and purified by ammonium sulfate precipitation, followed by DE-52 cation exchange chromatography. PE-anti-mouse Fc $\gamma$ RIII mAb was purchased from R&D Systems; APC-anti-mouse IL-3R, APC-anti-F4/80, APC-anti-mouse c-kit, biotin-anti-mouse c-kit, APC-anti-human Fc $\gamma$ RII, PE-anti-human Fc $\gamma$ RIII, FITC-anti-human CD15, and PerCP/Cy5.5-anti-human CD163 mAbs were purchased

from eBioscience; FITC-anti-B220, FITC-anti-mouse CD19, PE-anti-mouse IL-4R $\alpha$ , PerCP-anti-mouse CD8, FITC-anti-mouse Ly6G, APC-anti-DX5 (CD49b), FITC-anti-mouse IgE, PerCP-anti-mouse CD11b, PerCP-Cy5.5-anti-CD11c, FITC- and APC-anti-mouse CD4, PE-anti-DX5, streptavidin-PE, streptavidin-PerCP, and corresponding isotype controls were purchased from BD Biosciences. Abs for measurement of in vivo IL-4 secretion (biotin-BVD4-1D11 and BVD6-24G2.3) were obtained from BD. Platelet activating factor was purchased from BIOMOL (now Enzo Life Sciences International). Histamine was purchased from Sigma-Aldrich. Water-soluble peanut extract (4) and TNP-OVA (5) were prepared as previously described. IgG immune complexes (ICs) were prepared by mixing affinity-purified azide-free anti-human IgG and human IgG (Bethyl Laboratories) at a 1:1 ratio and incubating the mixture at room temperature for 30 min.

1. Unkeless JC (1979) Characterization of a monoclonal antibody directed against mouse macrophage and lymphocyte Fc receptors. *J Exp Med* 150:580-596.
2. Gessner JE, Heiken H, Tamm A, Schmidt RE (1998) The IgG Fc receptor family. *Ann Hematol* 76:231-248.
3. Baniyash M, Eshhar Z (1984) Inhibition of IgE binding to mast cells and basophils by monoclonal antibodies to murine IgE. *Eur J Immunol* 14:799-807.

4. Khodoun M, et al. (2009) Peanuts can contribute to anaphylactic shock by activating complement. *J Allergy Clin Immunol* 123:342-351.
5. Strait RT, Morris SC, Finkelman FD (2006) IgG blocking antibodies inhibit IgE-mediated anaphylaxis in vivo through both antigen interception and Fc $\gamma$ RIIb crosslinking. *J Clin Invest* 118:833-841.

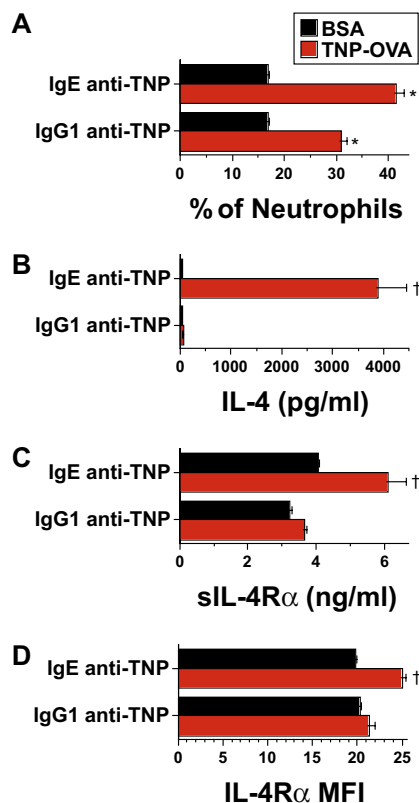

**Fig. S1.** Markers selective for IgE-mediated anaphylaxis. BALB/c mice were passively immunized i.v. with 10  $\mu$ g of IgE $\alpha$ TNP mAb or 100  $\mu$ g of IgG1 $\alpha$ TNP mAb and challenged the next day with 40  $\mu$ g of trinitrophenyl-ovalbumin (TNP-OVA) or BSA. Mice were injected at the time of challenge with 10  $\mu$ g of biotin-BVD4-1D11 (anti-IL-4) mAb for in vivo cytokine capture assay. Mice were bled 4 h after challenge, and the percentage of neutrophils in peripheral blood (A), IL-4 secretion (B), serum levels of sIL-4R $\alpha$  (C), and CD4 $^+$  T-cell IL-4R $\alpha$  expression (D) were determined.

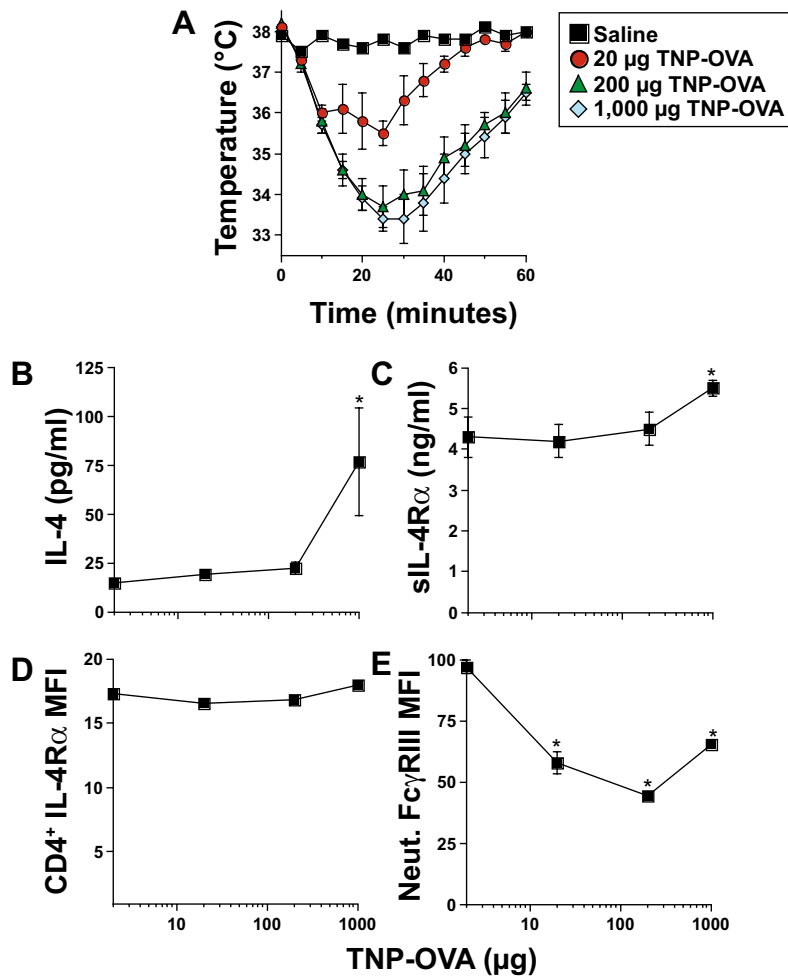

**Fig. 52.** Dose-dependence of IgG-mediated anaphylaxis. BALB/c mice were passively immunized with 100 µg of IgG1 anti-TNP mAb and challenged i.v. with 20, 200, or 1,000 µg of TNP-OVA. Mice were injected at the time of challenge with 10 µg of biotin-BVD4-1D11 (anti-IL-4) mAb for in vivo cytokine capture assay. (A) Rectal temperatures were determined during the 60 min after challenge. Mice were bled 4 h after challenge, and IL-4 secretion (B), serum sIL-4Rα levels (C), CD4<sup>+</sup> T-cell IL-4Rα expression (D), and neutrophil FcγRIII expression (E) were determined.

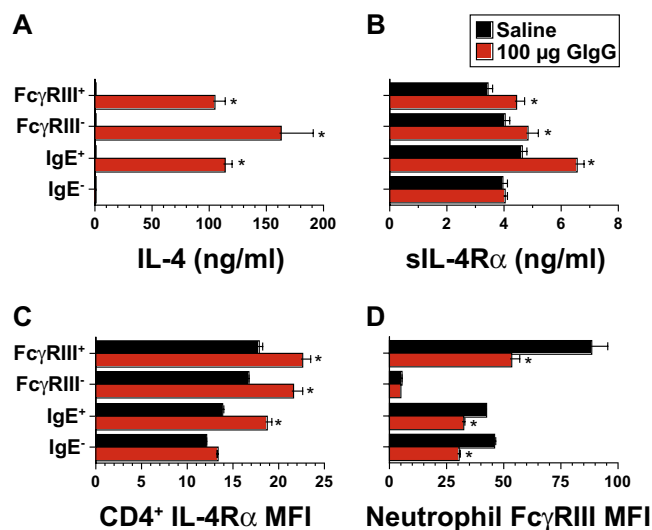

**Fig. 53.** IgE- and FcγRIII-dependence of markers for the classical and alternative anaphylaxis pathways. C57BL/6 wild-type (FcγRIII<sup>+</sup>) and FcγRIII-deficient (FcγRIII<sup>-</sup>) and FVB/N wild-type (IgE<sup>+</sup>) and IgE-deficient (IgE<sup>-</sup>) mice were actively immunized with 0.2 mL of goat anti-mouse IgD antiserum and challenged 14 d later with 100 µg of goat IgG (GlgG). Mice were injected at the time of challenge with 10 µg of biotin-BVD4-1D11 (anti-IL-4) mAb for in vivo cytokine capture assay. Mice were bled 4 h after challenge, and IL-4 secretion (A), serum sIL-4Rα levels (B), CD4<sup>+</sup> T-cell IL-4Rα expression (C), and neutrophil FcγRIII expression (D) were determined.
